# Supplementary material
Source: publisher figshare collection journal article supplement (https://tandf.figshare.com/articles/dataset/_/9034235)

Laura Huljek, Dario Perković & Zoran Kovač  
University of Zagreb, Faculty of Mining, Geology and Petroleum Engineering  
Pierottijeva 6, 10000 Zagreb, Croatia

DEM source on preview map: European Environment Agency  
Topographical layers on full map: © OpenStreetMap (and) contributors, CC-BY-SA

© Journal of Maps, 2019

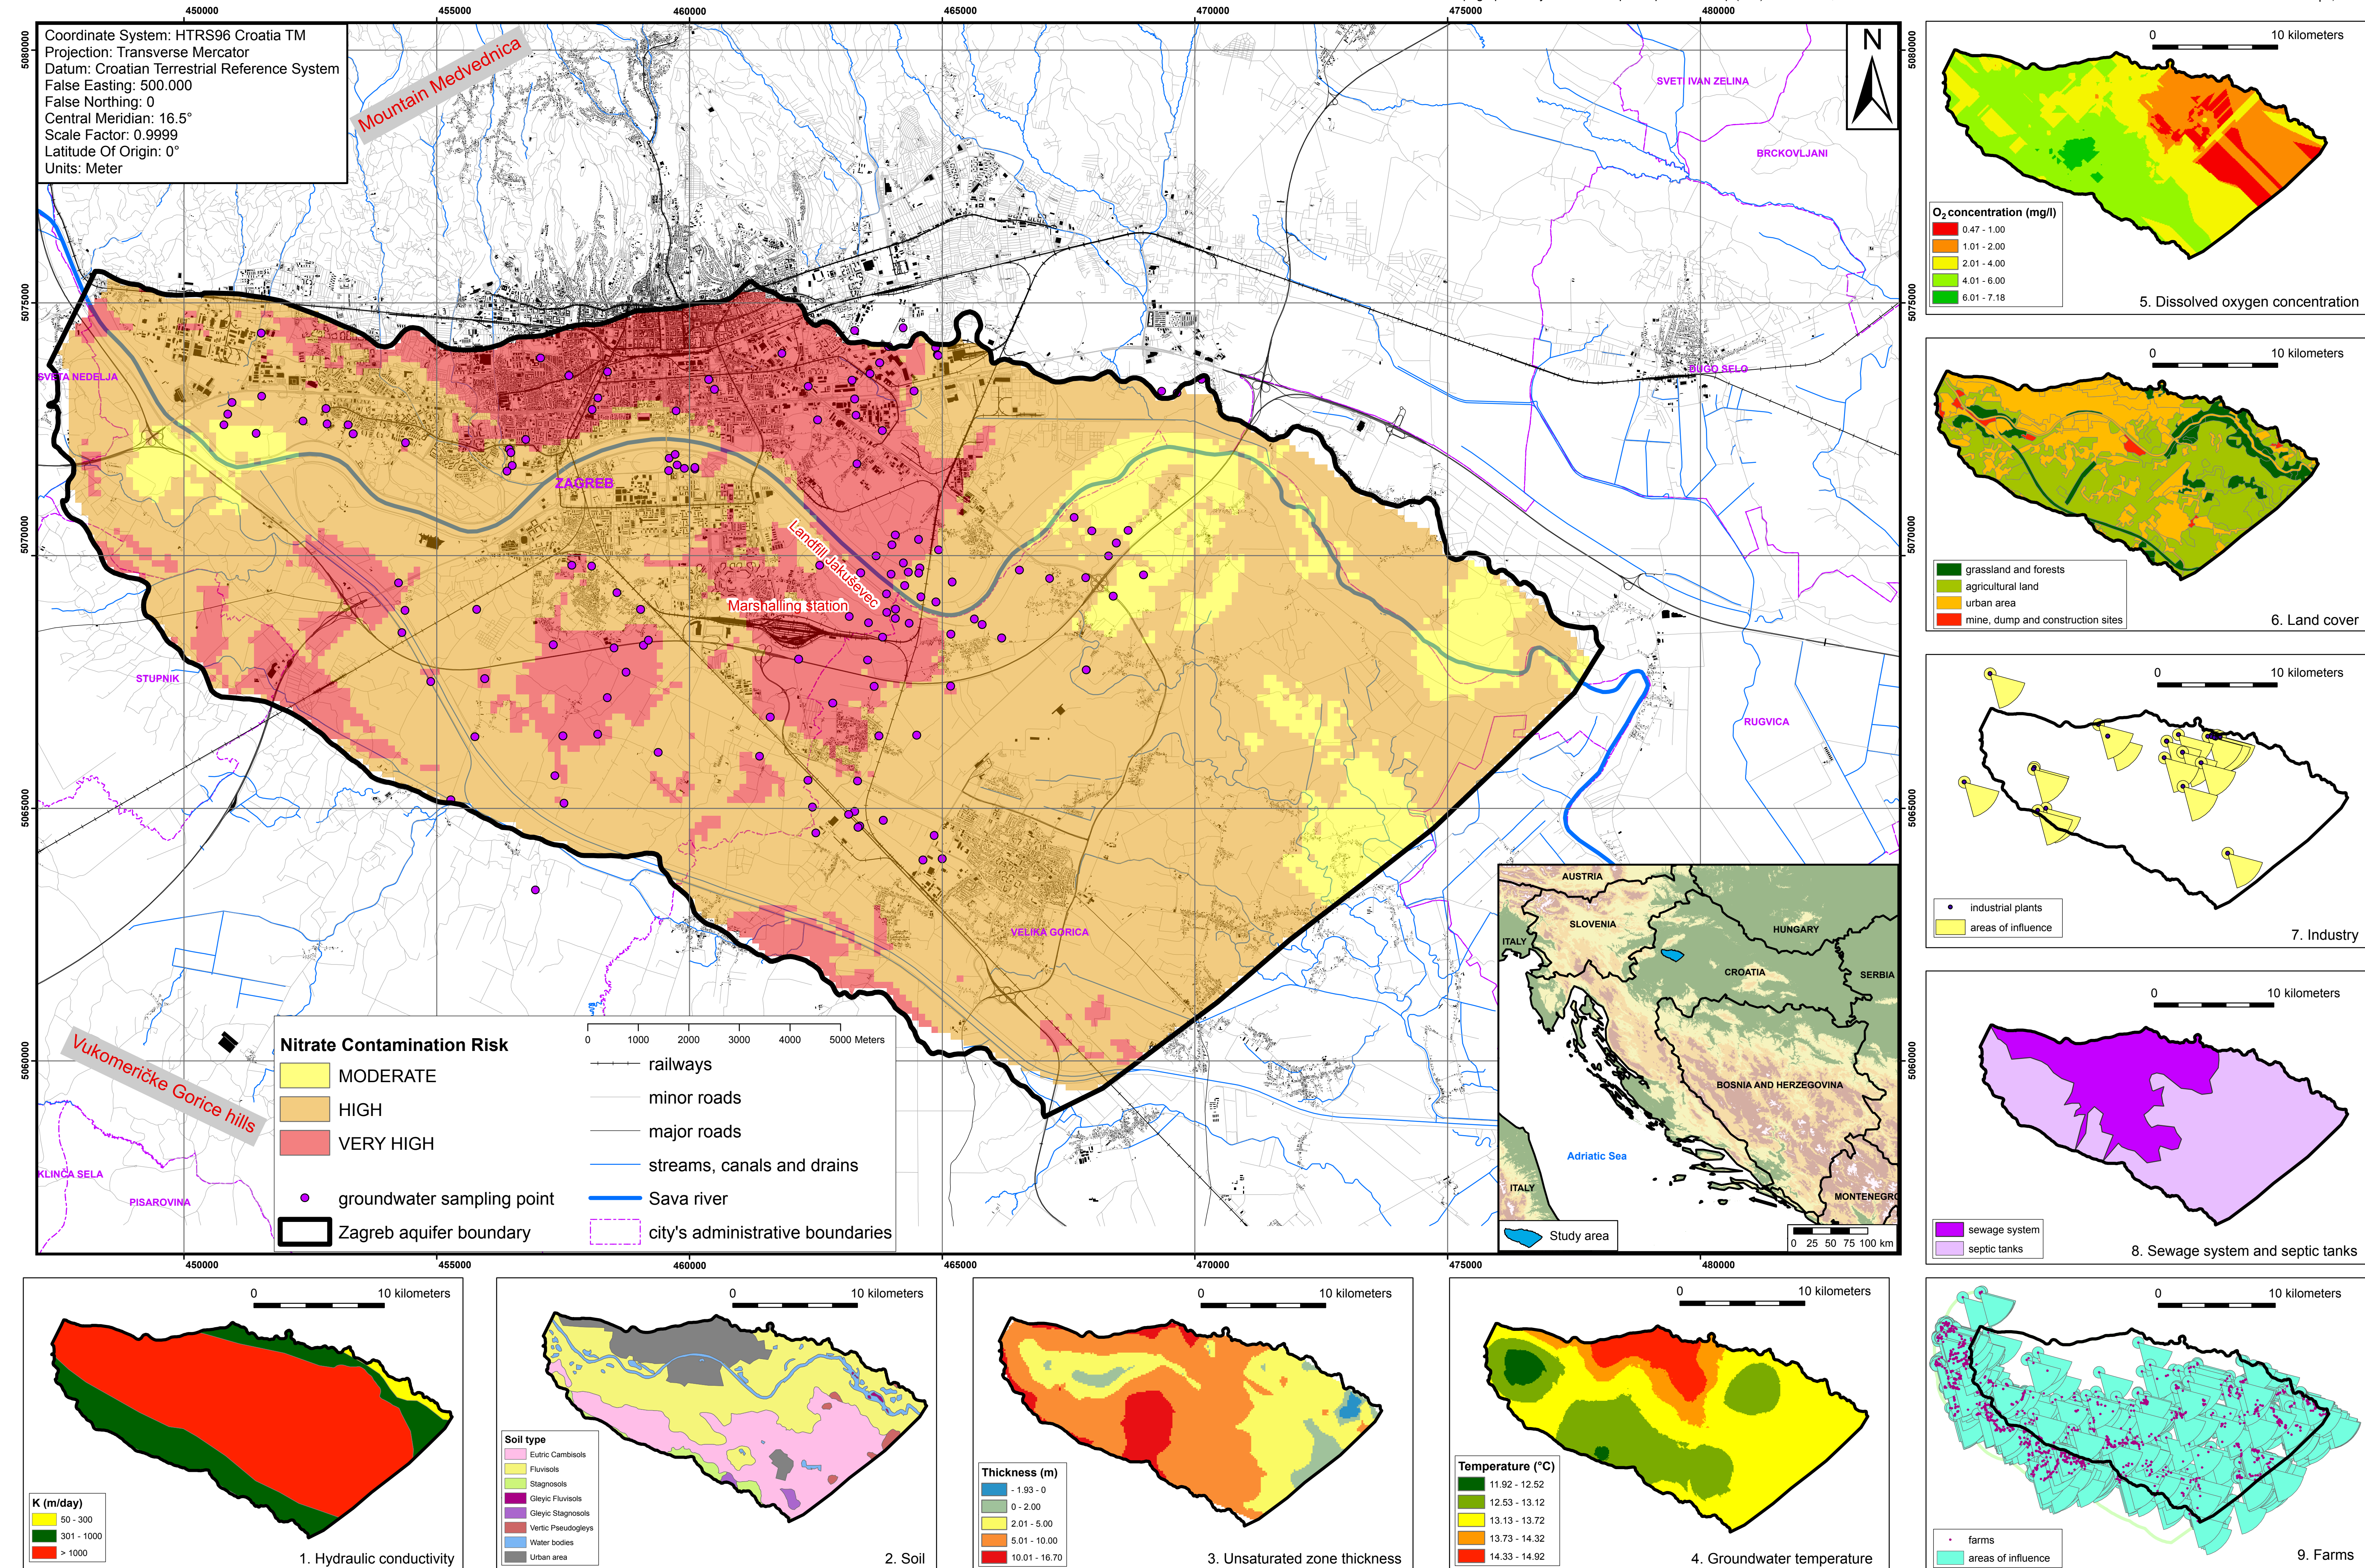

Supplement: Supplementary file 1 [file 2]
